# Supplementary material
Source: Springer Nature journal article supplement (https://www.springermedizin.de/resource/supplementary/12913_2013_2994_MOESM2_ESM.pdf/9533166)

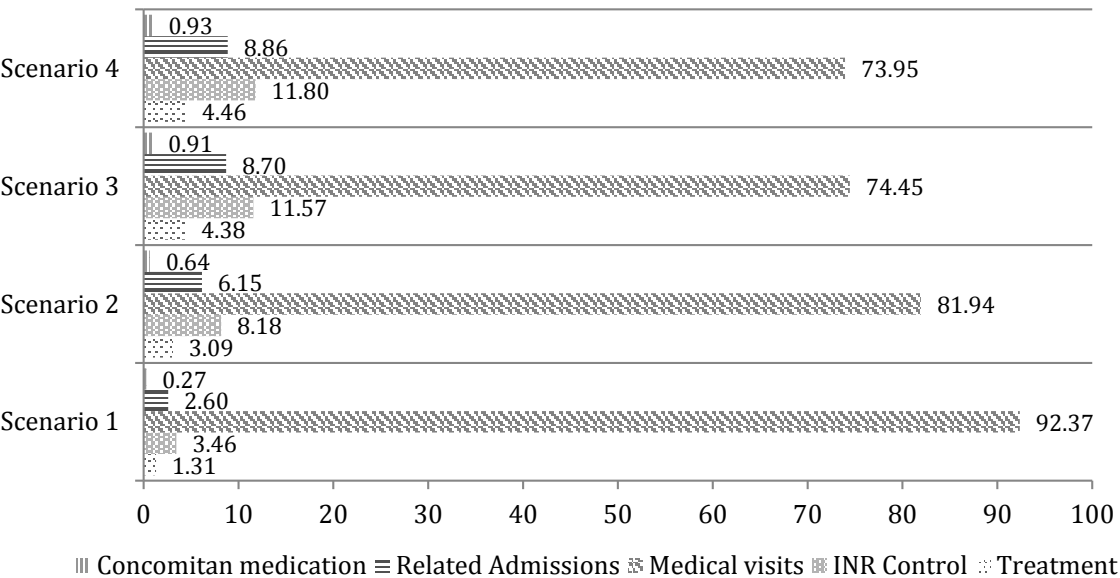

||| Concomitant medication ≡ Related Admissions ≡ Medical visits ≡ INR Control ≡ Treatment

Supplement: MOESM2 [file 9533166]
